# Supplementary material
Source: PubMed Central journal article supplement (PMC11711518)
Supplement: ajcr0014-5752-f7.pdf [file ajcr0014-5752-f7.pdf]

Synergistic antitumor effect of ADC DX126-262 combined with Cisplatin and 5-FU

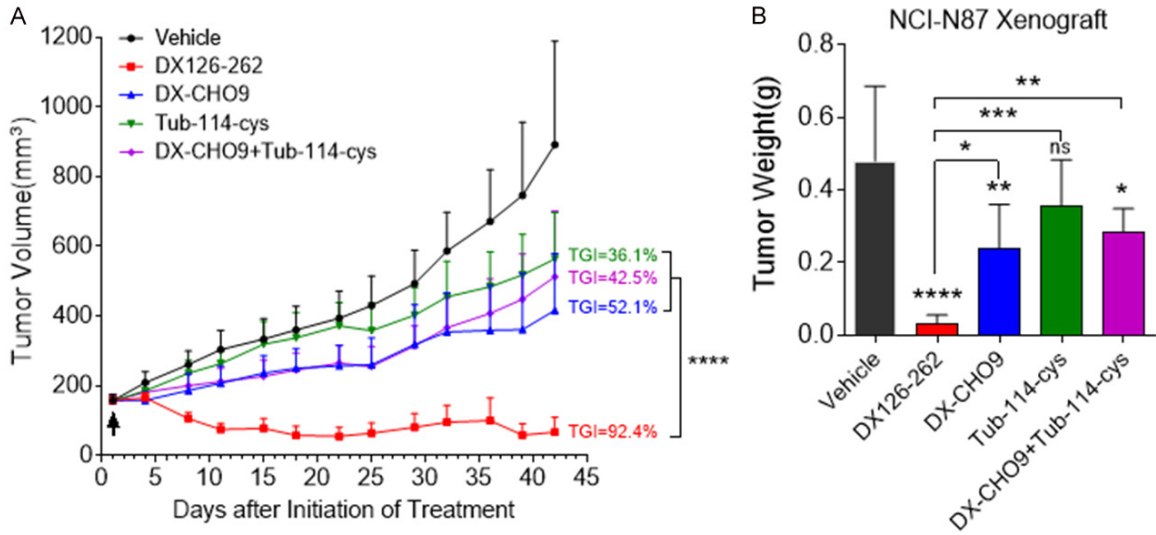

**Supplementary Figure 1.** DX126-262 demonstrated superior *in vivo* antitumor activity when compared to the single drug or combination of antibody and payload. **A.** *In vivo* antitumor efficacy of DX126-262 (ADC), DX-CHO9 (mAb), Tub-114-cys (payload), and DX-CHO9 combined with Tub-114-cys were evaluated in NCI-N87 xenograft model. The tumor-bearing mice were intravenously administered with DX126-262 (8 mg/kg), DX-CHO9 (8 mg/kg), Tub-114-cys (equal molar concentration with DX126-262) or the combination of DX-CHO9 and Tub-114-cys. The arrow indicates the date of a single intravenous administration. Each point represents the Mean tumor volume and SD (n=10). \*\*\*\**P*<0.0001. **B.** Tumor weights of NCI-N87 xenografts were represented as Mean ± SD. ns: no significance, \**P*<0.05, \*\**P*<0.01, \*\*\**P*<0.001, \*\*\*\**P*<0.0001.
